# Supplementary material for: Age-dependent ataxia and neurodegeneration caused by an αII spectrin mutation with impaired regulation of its calpain sensitivity
Source: PubMed Central journal article supplement (PMC8012654; doi:10.1038/s41598-021-86470-1), 2021-03-31
Supplement: 41598_2021_86470_MOESM2_ESM.pdf [file 41598_2021_86470_MOESM2_ESM.pdf]

## Supplemental Material

### Age-dependent ataxia and neurodegeneration caused by an $\alpha$ II spectrin mutation with impaired regulation of its calpain sensitivity

Arkadiusz Miazek<sup>1,3</sup>, Michał Zalas<sup>1</sup>, Joanna Skrzymowska<sup>1</sup>, Bryan A. Bogin<sup>2</sup>, Krzysztof Grzymajło<sup>3</sup>, Tomasz Goszczynski<sup>1</sup>, Zachary A. Levine<sup>2,4</sup>, Jon S. Morrow<sup>4,5,^</sup> and Michael C. Stankewich<sup>4,^</sup>

1 Department of Tumor Immunology, Hirszfeld Institute of Immunology and Experimental Therapy, Polish Academy of Sciences, Weigla 12, 53-114 Wrocław, Poland

2 Department of Molecular Biophysics & Biochemistry, Yale University, New Haven, CT, U.S.A

3 Department of Biochemistry and Molecular Biology, Wrocław University of Environmental and Life Sciences, Norwida 31, 50-375 Wrocław, Poland

4 Department of Pathology, Yale School of Medicine, New Haven, CT, U.S.A

5 Department of Molecular, Cellular, and Developmental Biology, Yale University, New Haven, CT, U.S.A

^ Co-senior Authors

### Supplemental Figure Legends

Figure S1: Coordination testing of R1098 and Q1098 mice.

Figure S2: In-utero comparison of fetal mice.

Figure S3: Comparison of WT vs. heterozygote cerebellum immunostained for  $\beta$ III-spectrin at postnatal day 7.

Figure S4: Secondary structure predictions

Figure S5: Compaction of the spectrin repeat unit relaxed in mutant

Figure S6: Original un-cropped Western blots used in Figure 3.

Figure S7: Measured cerebellar changes with age.

Table T1: Variants identified by WES

Movie M1: WT vs. R1098Q mice at 9 months of age.

Movie M2: Dynamics simulation of WT vs Q1098 spectrin  $\pm$  calmodulin; Y1176 (calpain cleavage site) is colored blue.

**a**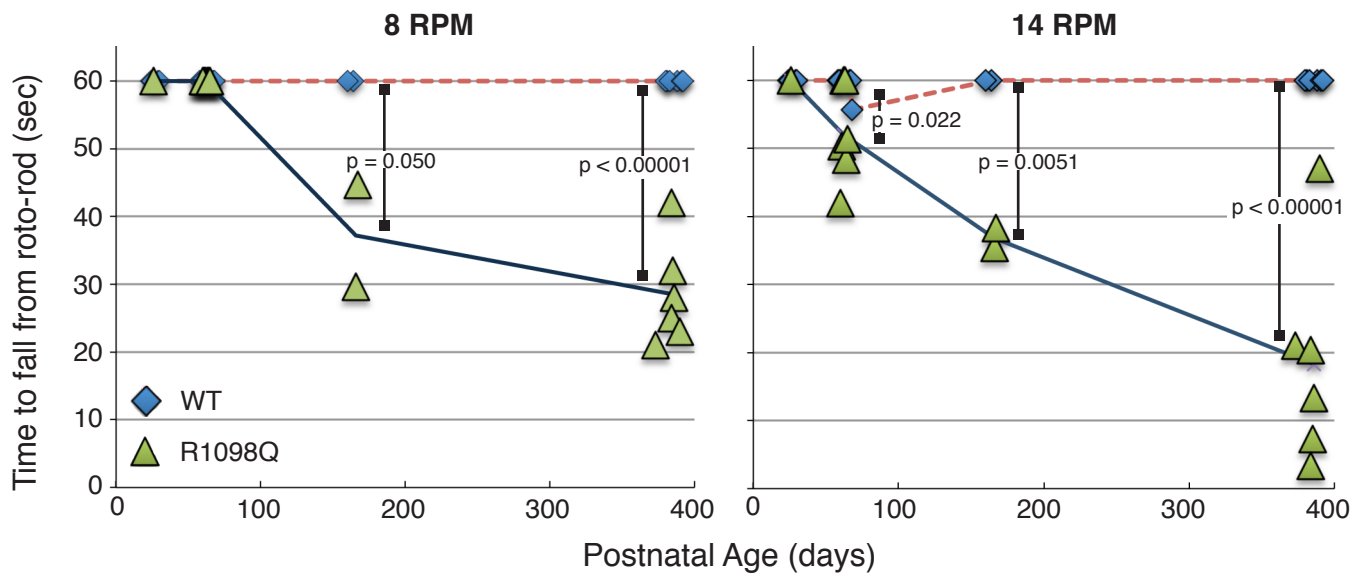**b**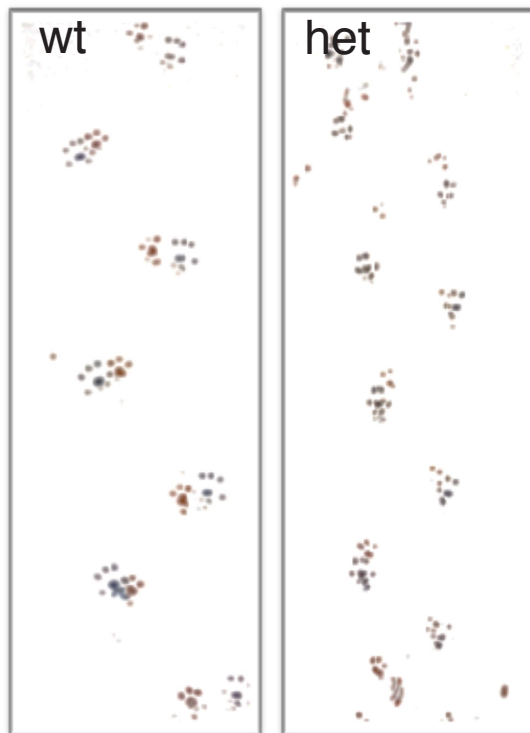**c**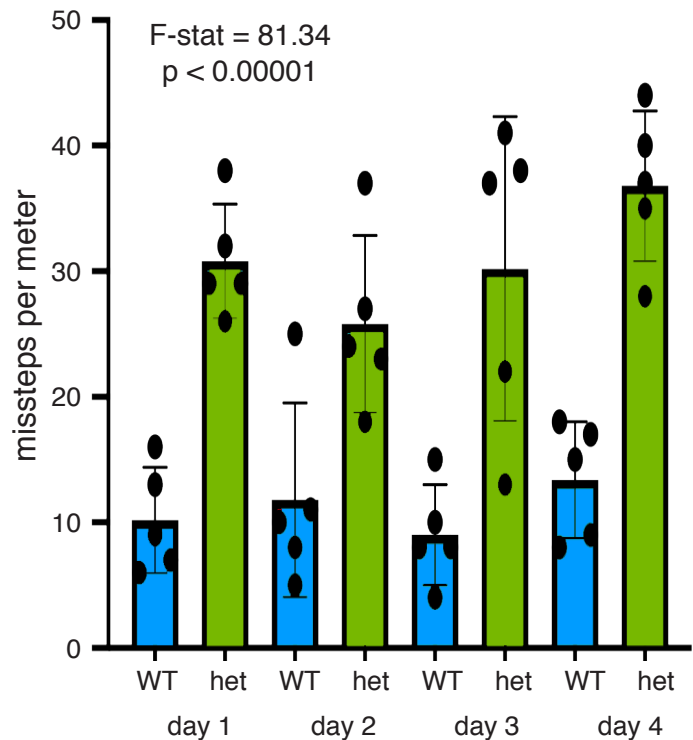

### Supplemental Figure S1: - Coordination testing of R1098Q mice

*Age-dependent ataxia and neurodegeneration caused by an  $\alpha$ II spectrin mutation with impaired regulation of its calpain sensitivity*

Arkadiusz Miazek, Michał Zalas, Joanna Skrzymowska, Bryan A. Bogin, Krzysztof Grzymajło, Tomasz Goszczynski, Zachary A. Levine, Jon S. Morrow, and Michael C. Stankewich

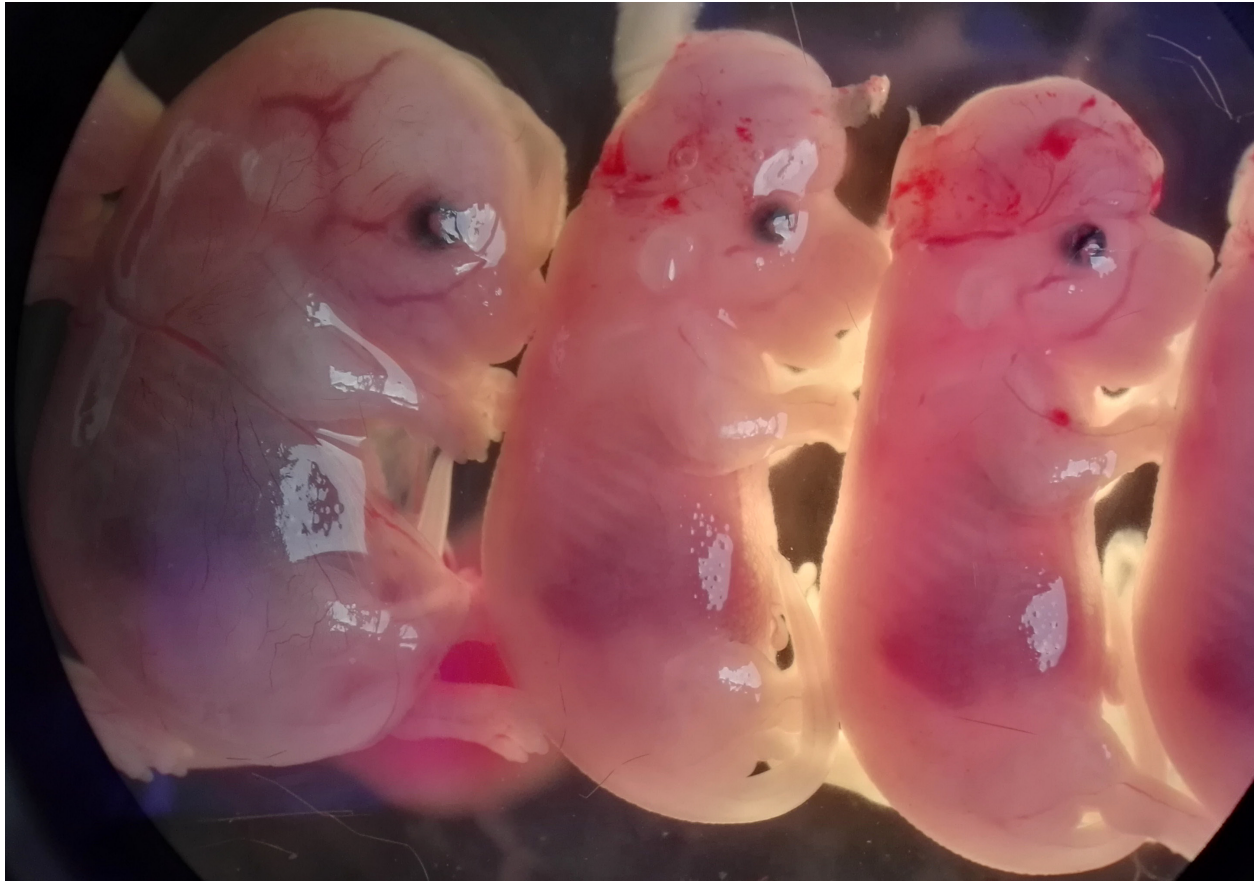

Wild Type  
 $\alpha$ II spectrin

R1098Q  
 $\alpha$ II spectrin  
homozygous

R1098Q  
 $\alpha$ II spectrin  
homozygous

**Supplemental Figure S2 - In-utero comparison of fetal mice**

*Age-dependent ataxia and neurodegeneration caused by an  $\alpha$ II spectrin mutation with impaired regulation of its calpain sensitivity*

Arkadiusz Miazek, Michał Zalas, Joanna Skrzymowska, Bryan A. Bogin, Krzysztof Grzymajło, Tomasz Goszczynski, Zachary A. Levine, Jon S. Morrow, and Michael C. Stankewich

P7 brain stained with anti- $\beta$ III spectrin

WT

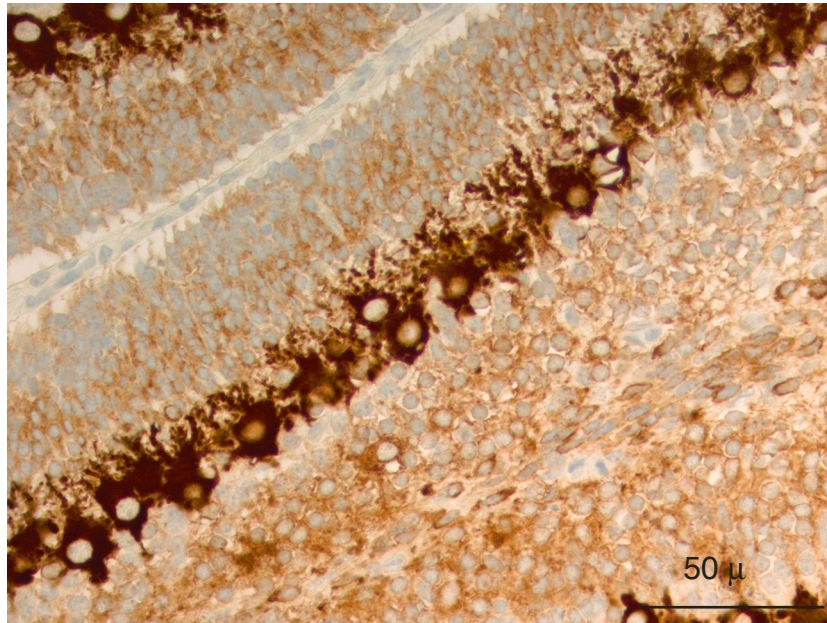

R1098Q  
het

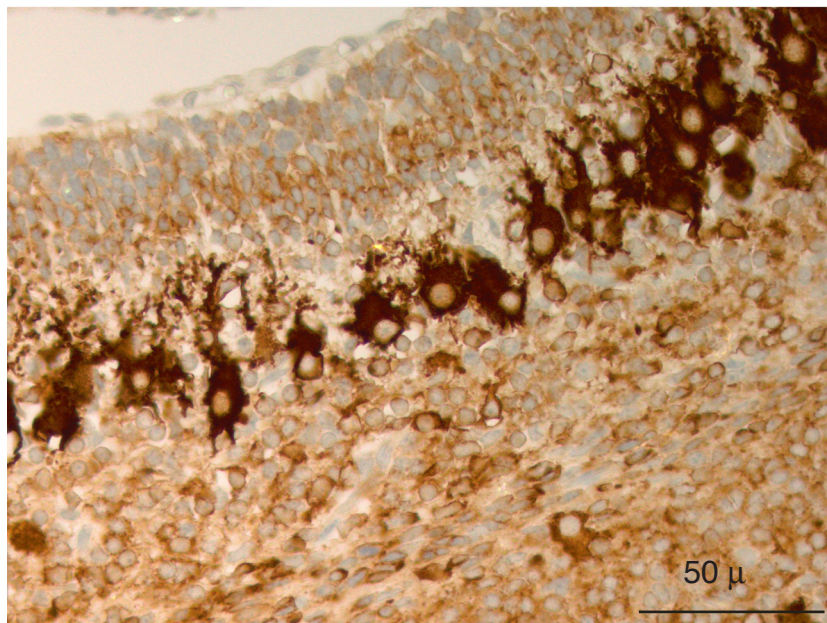

**Supplemental Figure 3:** Comparison of wt vs heterozygote cerebellum immunostained for  $\beta$ III-spectrin at postnatal day 7.

*Age-dependent ataxia and neurodegeneration caused by an  $\alpha$ II spectrin mutation with impaired regulation of its calpain sensitivity*

Arkadiusz Miazek, Michał Zalas, Joanna Skrzymowska, Bryan A. Bogin, Krzysztof Grzymajło, Tomasz Goszczynski, Zachary A. Levine, Jon S. Morrow, and Michael C. Stankewich

**a**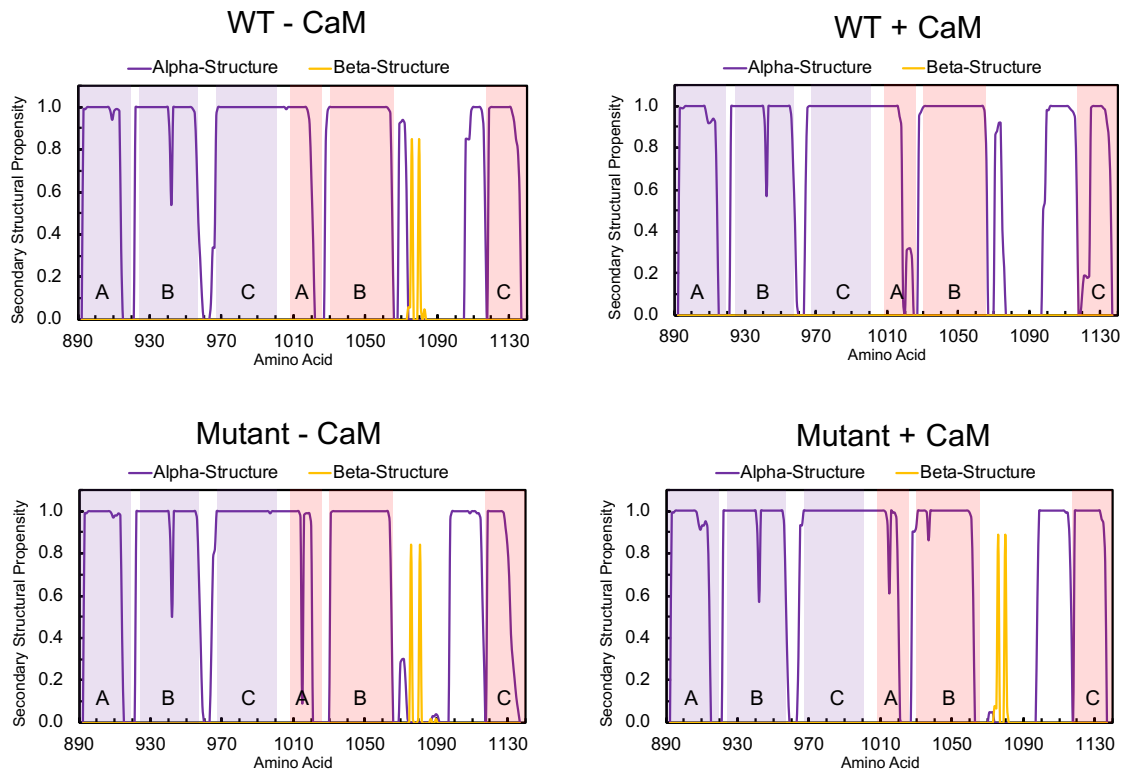**b**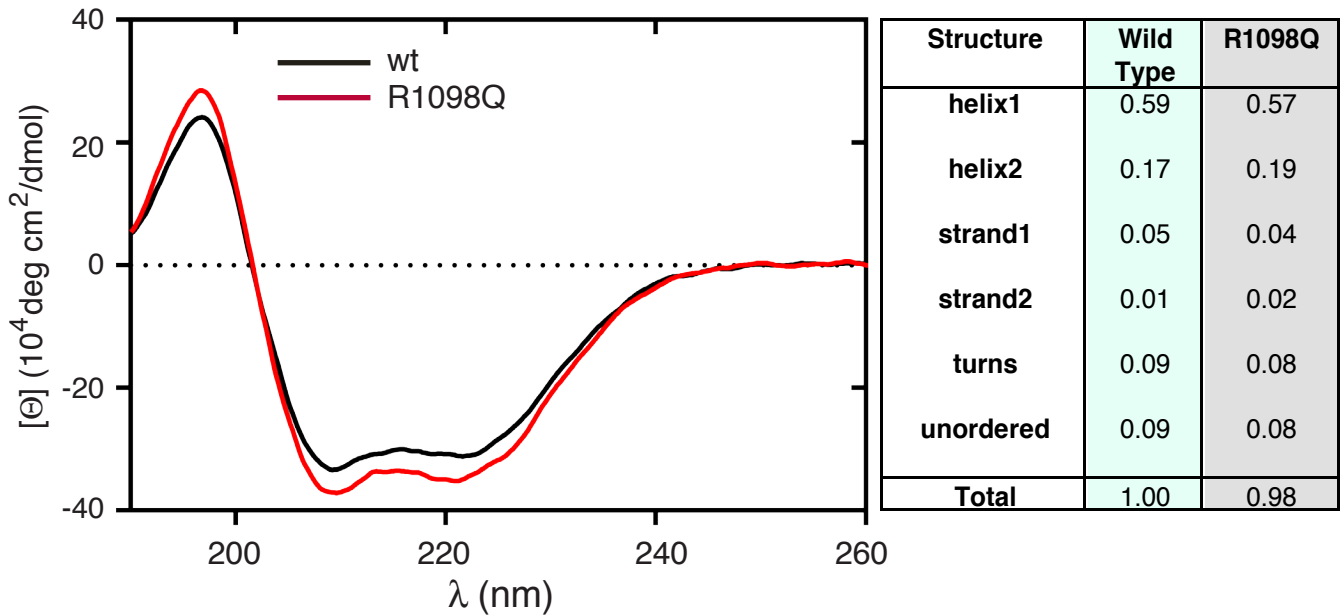**Supplemental Figure S4** - Secondary Structure Predictions.

*Age-dependent ataxia and neurodegeneration caused by an  $\alpha$ II spectrin mutation with impaired regulation of its calpain sensitivity*

Arkadiusz Miazek, Michał Zalas, Joanna Skrzymowska, Bryan A. Bogin, Krzysztof Grzymajło, Tomasz Goszczynski, Zachary A. Levine, Jon S. Morrow, and Michael C. Stankewich

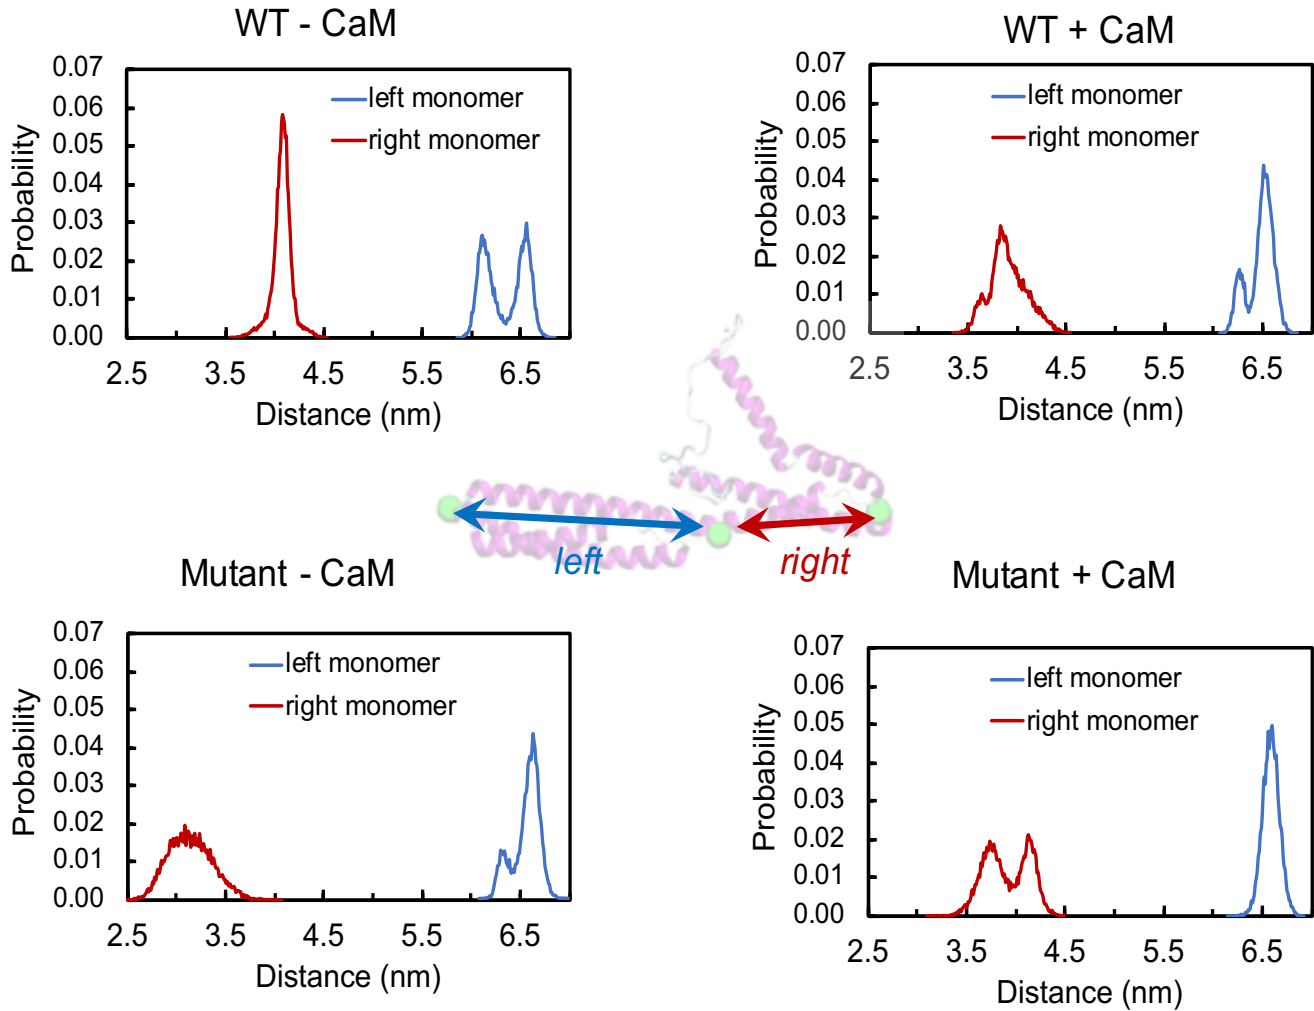

**Supplemental Figure S5 - Compaction of the spectrin repeat unit relaxed in mutant**

*Age-dependent ataxia and neurodegeneration caused by an  $\alpha$ II spectrin mutation with impaired regulation of its calpain sensitivity*

Arkadiusz Miazek, Michał Zalas, Joanna Skrzymowska, Bryan A. Bogin, Krzysztof Grzymajło, Tomasz Goszczynski, Zachary A. Levine, Jon S. Morrow, and Michael C. Stankewich

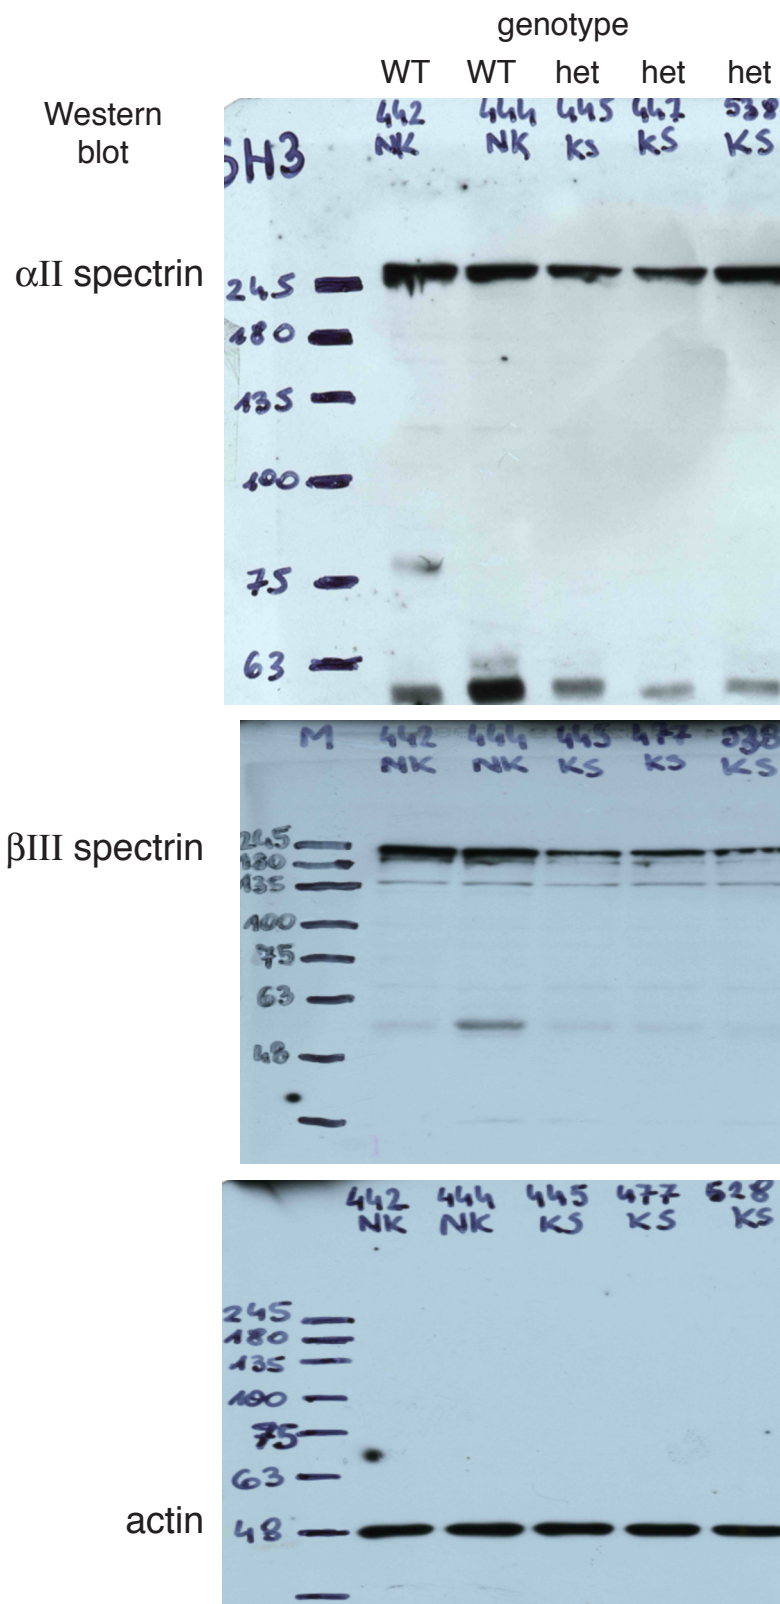

**Supplemental Figure 6:** Original uncropped western blots used in Figure 3.

*Age-dependent ataxia and neurodegeneration caused by an  $\alpha$ II spectrin mutation with impaired regulation of its calpain sensitivity*

Arkadiusz Miazek, Michał Zalas, Joanna Skrzymowska, Bryan A. Bogin, Krzysztof Grzymajło, Tomasz Goszczynski, Zachary A. Levine, Jon S. Morrow, and Michael C. Stankewich

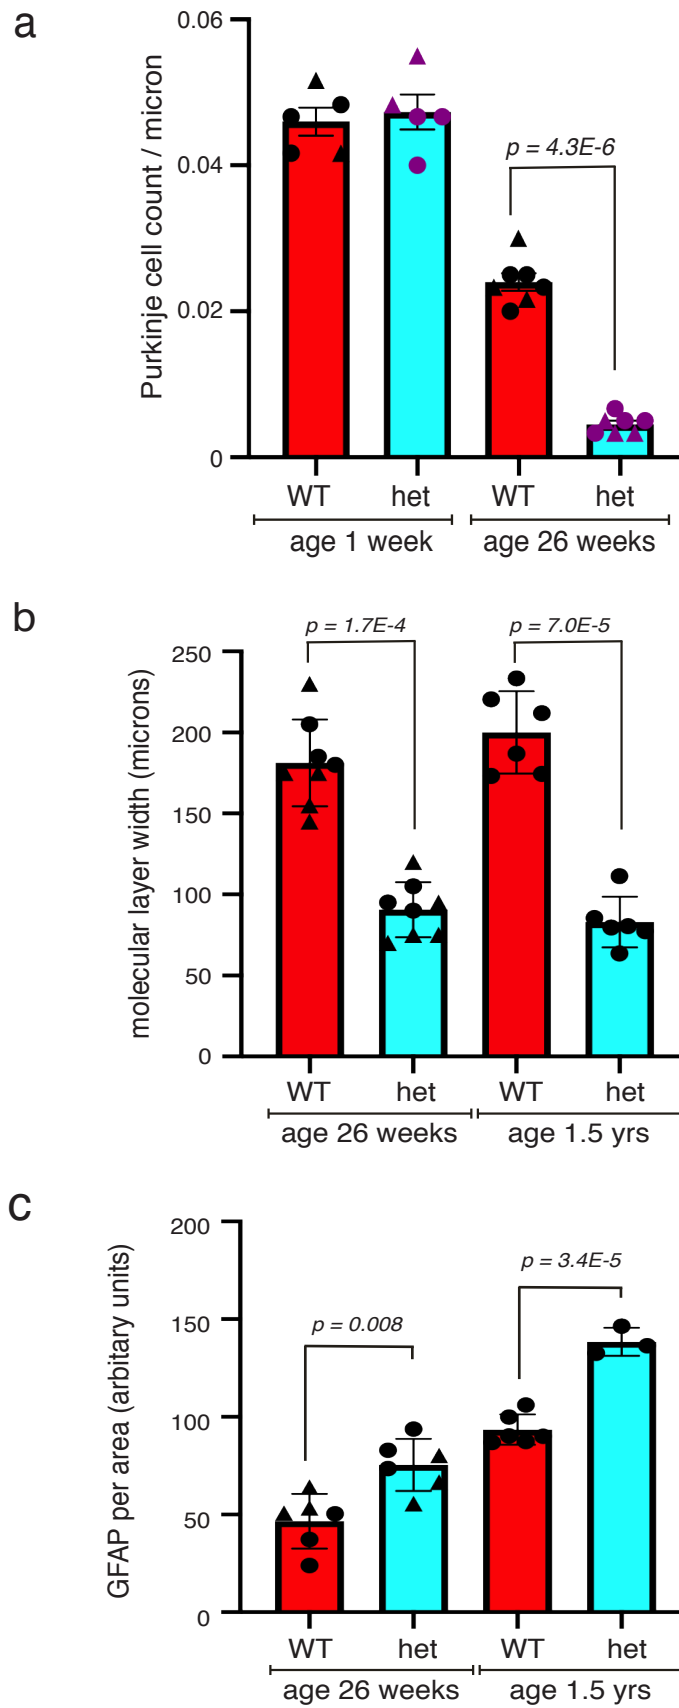

**Supplemental Figure 7:** Measured cerebellar changes with age.

*Age-dependent ataxia and neurodegeneration caused by an  $\alpha$ II spectrin mutation with impaired regulation of its calpain sensitivity*

Arkadiusz Miazek, Michał Zalas, Joanna Skrzymowska, Bryan A. Bogin, Krzysztof Grzymajło, Tomasz Goszczynski, Zachary A. Levine, Jon S. Morrow, and Michael C. Stankewich



**Age-dependent ataxia and neurodegeneration caused by an  $\alpha$ II spectrin mutation with impaired regulation of its calpain sensitivity**

Arkadiusz Miazek, Michał Zalas, Joanna Skrzymowska, Bryan A. Bogin, Krzysztof Grzymajło, Tomasz Goszczynski, Zachary A. Levine, Jon S. Morrow and Michael C. Stankewich

**Supplemental Table 1: Variants identified by WES in ataxia C57/B/6J mice but not in WT littermates.**

| Ch | gene          | name                                                                             | Putative function/association                                                                                         | SIFT               |
|----|---------------|----------------------------------------------------------------------------------|-----------------------------------------------------------------------------------------------------------------------|--------------------|
| 1  | AC133103.1    | BAC clone, not characterized                                                     |                                                                                                                       | tolerated          |
| 1  | AC168977.1    | BAC clone, not characterized                                                     |                                                                                                                       | deleterious        |
| 1  | Hjrp          | HJURP Holliday junction recognition protein                                      | DNA binding; cellular component organization                                                                          | tolerated          |
| 1  | Mroh2a        | MROH2A maestro heat like repeat family                                           | uncharacterized                                                                                                       | tolerated          |
| 1  | Prg4          | PRG4 proteoglycan 4                                                              | proteoglycan synthesis in cartilage                                                                                   | tolerated          |
| 1  | Rrs1          | RRS1 ribosome biogenesis regulator 1                                             | protein synthesis                                                                                                     | deleterious        |
| 1  | Ugt1a1        | UGT1A1 UDP glucuronosyltransferase family 1 member A1                            | Crigler-Najjar syndromes - metabolism of bilirubin                                                                    | tolerated          |
| 2  | <b>Sptan1</b> | <b>Spectrin non-erythroid alpha1</b>                                             | <b>West syndrome et al.</b>                                                                                           | <b>deleterious</b> |
| 3  | Pias3         | protein inhibitor of activated STAT 3<br>RPTN repetin                            | transferase; retinal phenotype<br>Diminished serum repetin levels in patients with schizophrenia and bipolar disorder | deleterious        |
| 3  | Rptn          |                                                                                  |                                                                                                                       | tolerated          |
| 4  | Zfp990        | Zfp990 zinc finger protein 990                                                   | transcriptional regulator                                                                                             | tolerated          |
| 5  | Gm17019       | predicted gene, not characterized                                                |                                                                                                                       | deleterious        |
| 5  | Tacc3         | TACC3 transforming acidic coiled-coil                                            | motor spindle protein that may play a role in                                                                         | tolerated          |
| 6  | Peg10         | PEG10 paternally expressed 10                                                    | role in cell proliferation, differentiation and                                                                       | deleterious        |
| 6  | Phf14         | PHF14 PHD finger protein 14                                                      | mitosis regulation and tumorigenesis                                                                                  | deleterious        |
| 7  | Zfp936        | Zfp936 zinc finger protein 936                                                   | transcription factor, low expression in brain                                                                         | deleterious        |
| 8  | Pkd1l3        | PKD1L3 polycystin 1 like 3, transient receptor<br>THAP1 THAP domain containing 1 | cation channel pores<br>proapoptotic factor that links PAWR to PML                                                    | tolerated          |
| 8  | Thap1         |                                                                                  | nuclear bodies.                                                                                                       | deleterious        |
| 10 | Duxf3         | Duxf3 double homeobox family member 3                                            | DNA binding                                                                                                           | tolerated          |
| 11 | Gm11555       | predicted gene, not characterized                                                |                                                                                                                       | tolerated          |
| 12 | Gm2022        | predicted gene, not characterized                                                |                                                                                                                       | tolerated          |
| 13 | Nkapl         | NKAPL NFKB activating protein like                                               | polymorphic associatoin with schizophrenia                                                                            | deleterious        |
| 14 | Gm21103       | predicted gene, not characterized                                                |                                                                                                                       | tolerated          |
| 15 | Krt78         | KRT78 keratin 78                                                                 | structural protein in epithelial                                                                                      | tolerated          |
| 16 | Muc13         | MUC13 mucin 13, cell surface associated                                          | epithelial mucin                                                                                                      | tolerated          |
| 16 | Muc4          | MUC4 mucin 4, cell surface associated<br>PRDM9 PR/SET domain 9                   | epithelial mucin<br>histone methyltransferase activity that catalyzes                                                 | tolerated          |
| 17 | Prdm9         |                                                                                  | histone H3 lysine 4 trimethylation (H3K4me3)                                                                          | deleterious        |
| 17 | Tbl3          | TBL3 transducin beta like 3                                                      | WD40 repeat protein mediating protein-protein                                                                         | tolerated          |
| 17 | Vmn2r114      | Vmn2r114 vomeronasal 2, receptor 114                                             | pheromone receptor                                                                                                    | deleterious        |
| 17 | Vmn2r115      | Vmn2r115 vomeronasal 2, receptor 115                                             | pheromone receptor                                                                                                    | deleterious        |
| 17 | Vmn2r117      | Vmn2r115 vomeronasal 2, receptor 117                                             | pheromone receptor                                                                                                    | tolerated          |
| x  | Cdr1          | CDR1 cerebellar degeneration related protein 1                                   | Cerebellar degeneration-related autoantigen 1                                                                         | tolerated          |
| x  | Vmn2r121      | Vmn2r121 vomeronasal 2, receptor 121                                             | pheromone receptor                                                                                                    | deleterious        |
| y  | Gm4064        | predicted gene, not characterized                                                |                                                                                                                       | tolerated          |
